# Supplementary material
Source: ML conference proceedings conference paper supplement (https://openaccess.thecvf.com/content/WACV2023/html/Ma_Burst_Vision_Using_WACV_2023_paper.html)
Supplement: Supplementary file 2 [file Ma_Burst_Vision_Using_WACV_2023_supplemental.zip]

Archive with 2 entries (2 files):
- tech_report.pdf
- video.mp4
